# Supplementary material for: Flame-Retardant and Smoke Suppression Properties of Nano MgAl-LDH Coating on Bamboo Prepared by an In Situ Reaction
Source: Hindawi journal article supplement (doi:10.1155/2019/9067510), 2019-05-22

**Flame-retardant and smoke-suppression properties of a MgAl-LDH/bamboo composite prepared by an in situ reaction**

**support information**


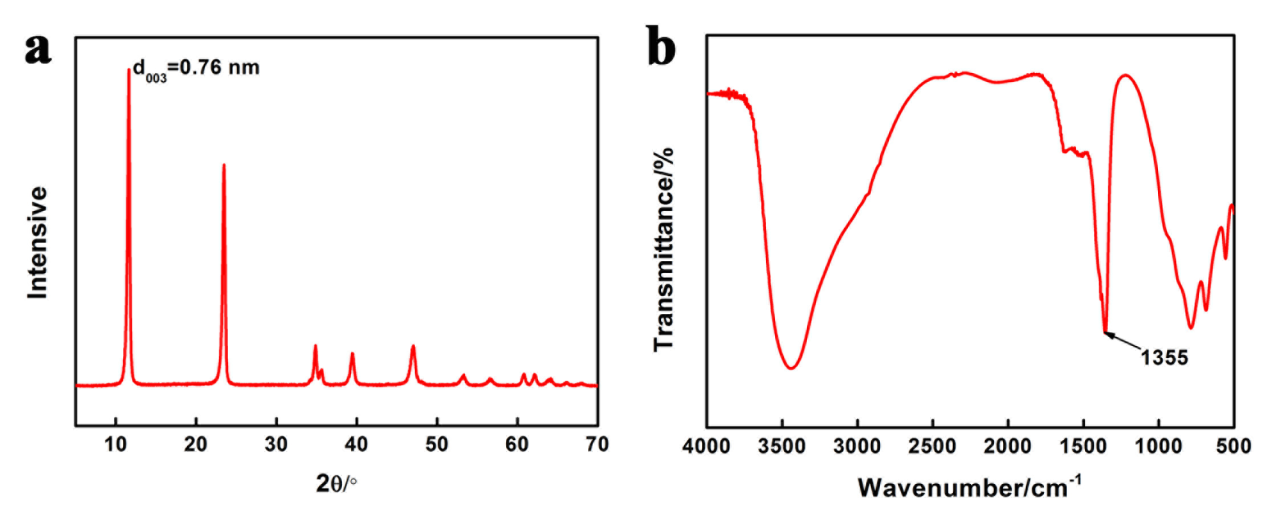


Fig. S1 (a) The XRD patterns of the LDH prepared by urea method, (b) The FTIR spectra of the LDH prepared by urea method

**graphic abstract**


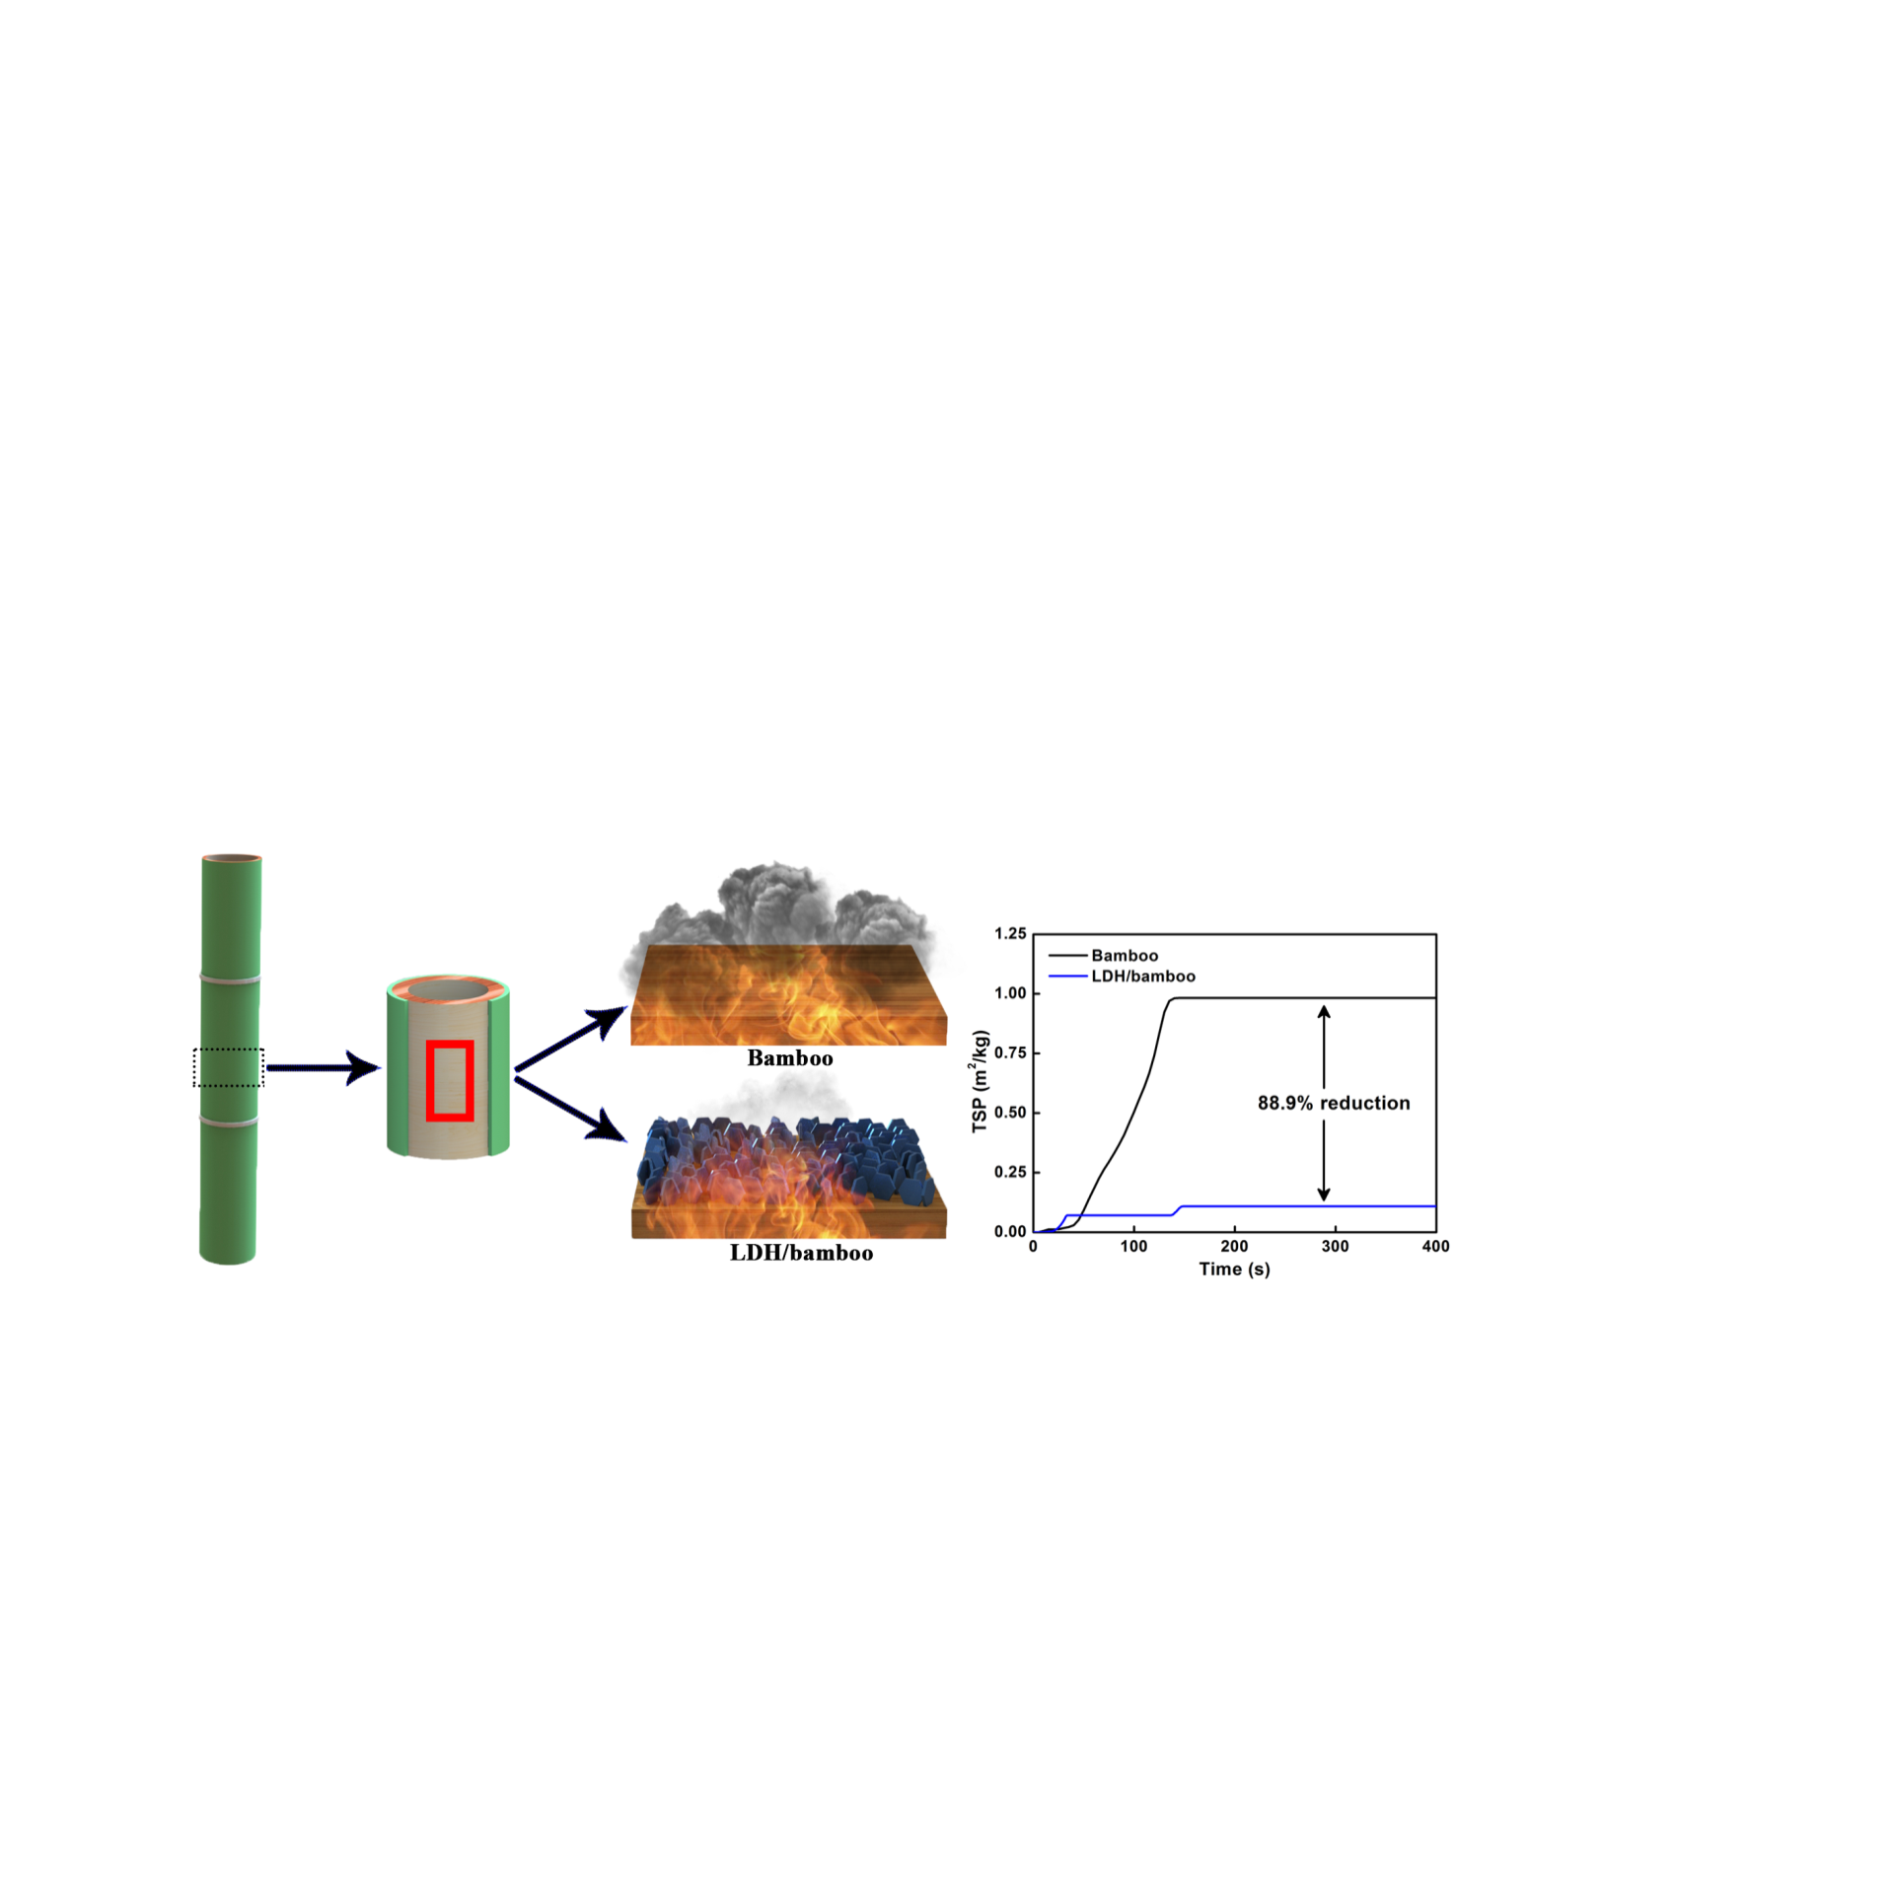

Supplement: f1 [file 9067510.f1.docx]
